# Supplementary material for: Construction of a High-density Genetic Map and Identification of Candidate Genes for Resistance to Fusarium Wilt based on the Resequencing of Recombinant Inbred Line Population in Gossypium Barbadense
Source: Research Square preprint supplement (doi:10.21203/rs.3.rs-139530/v1), 2021-01-14
Supplement: Supplementary file 1 [file 3ed1c98a548deef2c8c61035.xlsx]

## Sheet: Sheet1
Table S6 cis-acting elements analysis of 36 candidate genes
GOBAR_DD02557	TCA-element	CCATCTTTTT	1859	9	+	Nicotiana tabacum	cis-acting element involved in salicylic acid responsiveness
GOBAR_DD02557	MRE	AACCTAA	1107	7	+	Petroselinum crispum	MYB binding site involved in light responsiveness
GOBAR_DD07060	TC-rich repeats	ATTCTCTAAC	1087	10	-	Nicotiana tabacum	cis-acting element involved in defense and stress responsiveness
GOBAR_DD07060	ABRE	ACGTG	1084	5	-	Arabidopsis thaliana	cis-acting element involved in the abscisic acid responsiveness
GOBAR_DD07060	ABRE	ACGTG	1599	5	-	Arabidopsis thaliana	cis-acting element involved in the abscisic acid responsiveness
GOBAR_DD07060	ABRE	ACGTG	1641	5	-	Arabidopsis thaliana	cis-acting element involved in the abscisic acid responsiveness
GOBAR_DD07060	TGACG-motif	TGACG	920	5	-	Hordeum vulgare	cis-acting regulatory element involved in the MeJA-responsiveness
GOBAR_DD07060	TGACG-motif	TGACG	1592	5	+	Hordeum vulgare	cis-acting regulatory element involved in the MeJA-responsiveness
GOBAR_DD07060	TGACG-motif	TGACG	1643	5	-	Hordeum vulgare	cis-acting regulatory element involved in the MeJA-responsiveness
GOBAR_DD07060	CGTCA-motif	CGTCA	920	5	+	Hordeum vulgare	cis-acting regulatory element involved in the MeJA-responsiveness
GOBAR_DD07060	CGTCA-motif	CGTCA	1592	5	-	Hordeum vulgare	cis-acting regulatory element involved in the MeJA-responsiveness
GOBAR_DD07060	CGTCA-motif	CGTCA	1643	5	+	Hordeum vulgare	cis-acting regulatory element involved in the MeJA-responsiveness
GOBAR_DD07060	MBSI	TTTTTACGGTTA	1556	11	+	Petunia hybrida	MYB binding site involved in flavonoid biosynthetic genes regulation
GOBAR_DD07060	MRE	AACCTAA	725	7	-	Petroselinum crispum	MYB binding site involved in light responsiveness
GOBAR_DD07060	MRE	AACCTAA	1458	7	-	Petroselinum crispum	MYB binding site involved in light responsiveness
GOBAR_DD17781	ABRE	CACGTG	1756	6	-	Arabidopsis thaliana	cis-acting element involved in the abscisic acid responsiveness
GOBAR_DD17781	ABRE	ACGTG	1757	5	+	Arabidopsis thaliana	cis-acting element involved in the abscisic acid responsiveness
GOBAR_DD17781	TGACG-motif	TGACG	505	5	+	Hordeum vulgare	cis-acting regulatory element involved in the MeJA-responsiveness
GOBAR_DD17781	CGTCA-motif	CGTCA	505	5	-	Hordeum vulgare	cis-acting regulatory element involved in the MeJA-responsiveness
GOBAR_DD17781	MRE	AACCTAA	241	7	+	Petroselinum crispum	MYB binding site involved in light responsiveness
GOBAR_DD17781	CCAAT-box	CAACGG	960	6	-	Hordeum vulgare	MYBHv1 binding site
GOBAR_DD17783	ABRE	CACGTG	1756	6	-	Arabidopsis thaliana	cis-acting element involved in the abscisic acid responsiveness
GOBAR_DD17783	ABRE	ACGTG	1757	5	+	Arabidopsis thaliana	cis-acting element involved in the abscisic acid responsiveness
GOBAR_DD17783	CGTCA-motif	CGTCA	83	5	-	Hordeum vulgare	cis-acting regulatory element involved in the MeJA-responsiveness
GOBAR_DD17783	CGTCA-motif	CGTCA	500	5	-	Hordeum vulgare	cis-acting regulatory element involved in the MeJA-responsiveness
GOBAR_DD17783	TGACG-motif	TGACG	83	5	+	Hordeum vulgare	cis-acting regulatory element involved in the MeJA-responsiveness
GOBAR_DD17783	TGACG-motif	TGACG	500	5	+	Hordeum vulgare	cis-acting regulatory element involved in the MeJA-responsiveness
GOBAR_DD17783	MBSI	aaaAaaC(G/C)GTTA	282	10.5	-	Petunia hybrida	MYB binding site involved in flavonoid biosynthetic genes regulation
GOBAR_DD07507	TGA-element	AACGAC	579	6	+	Brassica oleracea	auxin-responsive element
GOBAR_DD07507	TCA-element	CCATCTTTTT	1108	9	+	Nicotiana tabacum	cis-acting element involved in salicylic acid responsiveness
GOBAR_DD07507	ABRE	ACGTG	280	5	-	Arabidopsis thaliana	cis-acting element involved in the abscisic acid responsiveness
GOBAR_DD07507	ABRE	ACGTG	1221	5	+	Arabidopsis thaliana	cis-acting element involved in the abscisic acid responsiveness
GOBAR_DD07507	CGTCA-motif	CGTCA	1219	5	-	Hordeum vulgare	cis-acting regulatory element involved in the MeJA-responsiveness
GOBAR_DD07507	TGACG-motif	TGACG	1219	5	+	Hordeum vulgare	cis-acting regulatory element involved in the MeJA-responsiveness
GOBAR_DD07507	MBSI	aaaAaaC(G/C)GTTA	1795	10.5	-	Petunia hybrida	MYB binding site involved in flavonoid biosynthetic genes regulation
GOBAR_DD07507	CCAAT-box	CAACGG	1795	6	+	Hordeum vulgare	MYBHv1 binding site
GOBAR_DD17782	TGA-element	AACGAC	236	6	+	Brassica oleracea	auxin-responsive element
GOBAR_DD17782	ABRE	ACGTG	1828	5	+	Arabidopsis thaliana	cis-acting element involved in the abscisic acid responsiveness
GOBAR_DD17782	AuxRR-core	GGTCCAT	707	7	-	Nicotiana tabacum	cis-acting regulatory element involved in auxin responsiveness
GOBAR_DD17782	CGTCA-motif	CGTCA	1040	5	+	Hordeum vulgare	cis-acting regulatory element involved in the MeJA-responsiveness
GOBAR_DD17782	TGACG-motif	TGACG	1040	5	-	Hordeum vulgare	cis-acting regulatory element involved in the MeJA-responsiveness
GOBAR_DD17782	MBS	CAACTG	1549	6	+	Arabidopsis thaliana	MYB binding site involved in drought-inducibility
GOBAR_DD17782	CCAAT-box	CAACGG	862	6	+	Hordeum vulgare	MYBHv1 binding site
GOBAR_DD26781	TC-rich repeats	ATTCTCTAAC	987	9	-	Nicotiana tabacum	cis-acting element involved in defense and stress responsiveness
GOBAR_DD26781	ABRE	CACGTG	316	6	+	Arabidopsis thaliana	cis-acting element involved in the abscisic acid responsiveness
GOBAR_DD26781	ABRE	ACGTG	317	5	+	Arabidopsis thaliana	cis-acting element involved in the abscisic acid responsiveness
GOBAR_DD26781	ABRE	ACGTG	773	5	+	Arabidopsis thaliana	cis-acting element involved in the abscisic acid responsiveness
GOBAR_DD26781	TGACG-motif	TGACG	1077	5	-	Hordeum vulgare	cis-acting regulatory element involved in the MeJA-responsiveness
GOBAR_DD26781	CGTCA-motif	CGTCA	1077	5	+	Hordeum vulgare	cis-acting regulatory element involved in the MeJA-responsiveness
GOBAR_DD26781	MRE	AACCTAA	627	7	-	Petroselinum crispum	MYB binding site involved in light responsiveness
GOBAR_DD26781	MRE	AACCTAA	1466	7	-	Petroselinum crispum	MYB binding site involved in light responsiveness
GOBAR_DD26781	CCAAT-box	CAACGG	1353	6	+	Hordeum vulgare	MYBHv1 binding site
GOBAR_DD37843	TGA-element	AACGAC	1487	6	-	Brassica oleracea	auxin-responsive element
GOBAR_DD37843	TC-rich repeats	ATTCTCTAAC	930	10	-	Nicotiana tabacum	cis-acting element involved in defense and stress responsiveness
GOBAR_DD37843	TC-rich repeats	ATTCTCTAAC	1366	9	-	Nicotiana tabacum	cis-acting element involved in defense and stress responsiveness
GOBAR_DD37843	ABRE	ACGTG	1035	5	+	Arabidopsis thaliana	cis-acting element involved in the abscisic acid responsiveness
GOBAR_DD37843	AuxRR-core	GGTCCAT	784	7	-	Nicotiana tabacum	cis-acting regulatory element involved in auxin responsiveness
GOBAR_DD37843	MRE	AACCTAA	1454	7	-	Petroselinum crispum	MYB binding site involved in light responsiveness
GOBAR_DD37844	TCA-element	CCATCTTTTT	156	9	-	Nicotiana tabacum	cis-acting element involved in salicylic acid responsiveness
GOBAR_DD37844	TCA-element	CCATCTTTTT	1969	9	+	Nicotiana tabacum	cis-acting element involved in salicylic acid responsiveness
GOBAR_DD37844	TGACG-motif	TGACG	1211	5	+	Hordeum vulgare	cis-acting regulatory element involved in the MeJA-responsiveness
GOBAR_DD37844	CGTCA-motif	CGTCA	1211	5	-	Hordeum vulgare	cis-acting regulatory element involved in the MeJA-responsiveness
GOBAR_DD37844	MBS	CAACTG	1980	6	-	Arabidopsis thaliana	MYB binding site involved in drought-inducibility
GOBAR_DD37844	MRE	AACCTAA	1592	7	+	Petroselinum crispum	MYB binding site involved in light responsiveness
GOBAR_DD37847	ABRE	CACGTG	260	6	+	Arabidopsis thaliana	cis-acting element involved in the abscisic acid responsiveness
GOBAR_DD37847	ABRE	ACGTG	261	5	+	Arabidopsis thaliana	cis-acting element involved in the abscisic acid responsiveness
GOBAR_DD37847	AuxRR-core	GGTCCAT	1503	7	+	Nicotiana tabacum	cis-acting regulatory element involved in auxin responsiveness
GOBAR_DD37847	TGACG-motif	TGACG	1099	5	+	Hordeum vulgare	cis-acting regulatory element involved in the MeJA-responsiveness
GOBAR_DD37847	CGTCA-motif	CGTCA	1099	5	-	Hordeum vulgare	cis-acting regulatory element involved in the MeJA-responsiveness
GOBAR_DD07520	TGA-element	AACGAC	1670	6	+	Brassica oleracea	auxin-responsive element
GOBAR_DD07520	TCA-element	CCATCTTTTT	1321	9	+	Nicotiana tabacum	cis-acting element involved in salicylic acid responsiveness
GOBAR_DD07520	ABRE	ACGTG	1095	5	-	Arabidopsis thaliana	cis-acting element involved in the abscisic acid responsiveness
GOBAR_DD07520	CGTCA-motif	CGTCA	1097	5	+	Hordeum vulgare	cis-acting regulatory element involved in the MeJA-responsiveness
GOBAR_DD07520	TGACG-motif	TGACG	1097	5	-	Hordeum vulgare	cis-acting regulatory element involved in the MeJA-responsiveness
GOBAR_DD07520	MRE	AACCTAA	1564	7	+	Petroselinum crispum	MYB binding site involved in light responsiveness
GOBAR_DD07508	TATC-box	TATCCCA	269	7	-	Oryza sativa	cis-acting element involved in gibberellin-responsiveness
GOBAR_DD07508	TATC-box	TATCCCA	850	7	-	Oryza sativa	cis-acting element involved in gibberellin-responsiveness
GOBAR_DD07508	ABRE	ACGTG	222	5	+	Arabidopsis thaliana	cis-acting element involved in the abscisic acid responsiveness
GOBAR_DD07508	AuxRR-core	GGTCCAT	740	7	+	Nicotiana tabacum	cis-acting regulatory element involved in auxin responsiveness
GOBAR_DD29755	ABRE	ACGTG	1873	5	+	Arabidopsis thaliana	cis-acting element involved in the abscisic acid responsiveness
GOBAR_DD29755	CCAAT-box	CAACGG	54	6	-	Hordeum vulgare	MYBHv1 binding site
GOBAR_DD26953	TC-rich repeats	GTTTTCTTAC	653	9	+	Nicotiana tabacum	cis-acting element involved in defense and stress responsiveness
GOBAR_DD26953	TCA-element	TCAGAAGAGG	612	9	-	Brassica oleracea	cis-acting element involved in salicylic acid responsiveness
GOBAR_DD26953	TGACG-motif	TGACG	1562	5	+	Hordeum vulgare	cis-acting regulatory element involved in the MeJA-responsiveness
GOBAR_DD26953	CGTCA-motif	CGTCA	1562	5	-	Hordeum vulgare	cis-acting regulatory element involved in the MeJA-responsiveness
GOBAR_DD26953	MRE	AACCTAA	1575	7	-	Petroselinum crispum	MYB binding site involved in light responsiveness
GOBAR_DD26955	MBS	CAACTG	1776	6	+	Arabidopsis thaliana	MYB binding site involved in drought-inducibility
GOBAR_DD33789	TC-rich repeats	GTTTTCTTAC	1703	9	-	Nicotiana tabacum	cis-acting element involved in defense and stress responsiveness
GOBAR_DD33789	CGTCA-motif	CGTCA	196	5	-	Hordeum vulgare	cis-acting regulatory element involved in the MeJA-responsiveness
GOBAR_DD33789	CGTCA-motif	CGTCA	409	5	+	Hordeum vulgare	cis-acting regulatory element involved in the MeJA-responsiveness
GOBAR_DD33789	TGACG-motif	TGACG	196	5	+	Hordeum vulgare	cis-acting regulatory element involved in the MeJA-responsiveness
GOBAR_DD33789	TGACG-motif	TGACG	409	5	-	Hordeum vulgare	cis-acting regulatory element involved in the MeJA-responsiveness
GOBAR_DD23679	TGA-element	AACGAC	1361	6	-	Brassica oleracea	auxin-responsive element
GOBAR_DD23679	TATC-box	TATCCCA	1660	7	+	Oryza sativa	cis-acting element involved in gibberellin-responsiveness
GOBAR_DD23679	TGACG-motif	TGACG	1866	5	-	Hordeum vulgare	cis-acting regulatory element involved in the MeJA-responsiveness
GOBAR_DD23679	CGTCA-motif	CGTCA	1866	5	+	Hordeum vulgare	cis-acting regulatory element involved in the MeJA-responsiveness
GOBAR_DD08476	ABRE	ACGTG	321	5	-	Arabidopsis thaliana	cis-acting element involved in the abscisic acid responsiveness
GOBAR_DD08476	ABRE	ACGTG	800	5	-	Arabidopsis thaliana	cis-acting element involved in the abscisic acid responsiveness
GOBAR_DD08476	CGTCA-motif	CGTCA	318	5	+	Hordeum vulgare	cis-acting regulatory element involved in the MeJA-responsiveness
GOBAR_DD08476	CGTCA-motif	CGTCA	674	5	-	Hordeum vulgare	cis-acting regulatory element involved in the MeJA-responsiveness
GOBAR_DD08476	TGACG-motif	TGACG	318	5	-	Hordeum vulgare	cis-acting regulatory element involved in the MeJA-responsiveness
GOBAR_DD08476	TGACG-motif	TGACG	674	5	+	Hordeum vulgare	cis-acting regulatory element involved in the MeJA-responsiveness
GOBAR_DD08476	MBS	CAACTG	1897	6	+	Arabidopsis thaliana	MYB binding site involved in drought-inducibility
GOBAR_DD05691	TGA-element	AACGAC	102	6	-	Brassica oleracea	auxin-responsive element
GOBAR_DD05691	TGA-element	AACGAC	784	6	+	Brassica oleracea	auxin-responsive element
GOBAR_DD05691	TATC-box	TATCCCA	66	7	-	Oryza sativa	cis-acting element involved in gibberellin-responsiveness
GOBAR_DD05691	TCA-element	CCATCTTTTT	1563	9	-	Nicotiana tabacum	cis-acting element involved in salicylic acid responsiveness
GOBAR_DD05691	ABRE	ACGTG	120	5	-	Arabidopsis thaliana	cis-acting element involved in the abscisic acid responsiveness
GOBAR_DD05691	TGACG-motif	TGACG	1738	5	+	Hordeum vulgare	cis-acting regulatory element involved in the MeJA-responsiveness
GOBAR_DD05691	CGTCA-motif	CGTCA	1738	5	-	Hordeum vulgare	cis-acting regulatory element involved in the MeJA-responsiveness
GOBAR_DD07057	ABRE	ACGTG	860	5	-	Arabidopsis thaliana	cis-acting element involved in the abscisic acid responsiveness
GOBAR_DD07057	CGTCA-motif	CGTCA	1458	5	+	Hordeum vulgare	cis-acting regulatory element involved in the MeJA-responsiveness
GOBAR_DD07057	TGACG-motif	TGACG	1458	5	-	Hordeum vulgare	cis-acting regulatory element involved in the MeJA-responsiveness
GOBAR_DD07057	MBS	CAACTG	1659	6	+	Arabidopsis thaliana	MYB binding site involved in drought-inducibility
GOBAR_DD07057	MBS	CAACTG	1994	6	-	Arabidopsis thaliana	MYB binding site involved in drought-inducibility
GOBAR_DD07063	TCA-element	CCATCTTTTT	1025	9	-	Nicotiana tabacum	cis-acting element involved in salicylic acid responsiveness
GOBAR_DD07063	ABRE	ACGTG	684	5	+	Arabidopsis thaliana	cis-acting element involved in the abscisic acid responsiveness
GOBAR_DD07063	ABRE	CACGTG	719	6	+	Arabidopsis thaliana	cis-acting element involved in the abscisic acid responsiveness
GOBAR_DD07063	ABRE	ACGTG	720	5	+	Arabidopsis thaliana	cis-acting element involved in the abscisic acid responsiveness
GOBAR_DD07063	ABRE	GCAACGTGTC	1275	9	-	Hordeum vulgare	cis-acting element involved in the abscisic acid responsiveness
GOBAR_DD07063	ABRE	ACGTG	1277	5	-	Arabidopsis thaliana	cis-acting element involved in the abscisic acid responsiveness
GOBAR_DD07063	AuxRR-core	GGTCCAT	1653	7	-	Nicotiana tabacum	cis-acting regulatory element involved in auxin responsiveness
GOBAR_DD07063	TGACG-motif	TGACG	1051	5	-	Hordeum vulgare	cis-acting regulatory element involved in the MeJA-responsiveness
GOBAR_DD07063	CGTCA-motif	CGTCA	1051	5	+	Hordeum vulgare	cis-acting regulatory element involved in the MeJA-responsiveness
GOBAR_DD07063	MBS	CAACTG	1154	6	-	Arabidopsis thaliana	MYB binding site involved in drought-inducibility
GOBAR_DD07063	MRE	AACCTAA	1758	7	+	Petroselinum crispum	MYB binding site involved in light responsiveness
GOBAR_DD23790	TCA-element	CCATCTTTTT	866	9	-	Nicotiana tabacum	cis-acting element involved in salicylic acid responsiveness
GOBAR_DD23790	ABRE	ACGTG	1041	5	+	Arabidopsis thaliana	cis-acting element involved in the abscisic acid responsiveness
GOBAR_DD23790	ABRE	ACGTG	1047	5	-	Arabidopsis thaliana	cis-acting element involved in the abscisic acid responsiveness
GOBAR_DD23790	CGTCA-motif	CGTCA	1049	5	+	Hordeum vulgare	cis-acting regulatory element involved in the MeJA-responsiveness
GOBAR_DD23790	TGACG-motif	TGACG	1049	5	-	Hordeum vulgare	cis-acting regulatory element involved in the MeJA-responsiveness
GOBAR_DD23790	MRE	AACCTAA	608	7	-	Petroselinum crispum	MYB binding site involved in light responsiveness
GOBAR_DD23790	MRE	AACCTAA	1009	7	+	Petroselinum crispum	MYB binding site involved in light responsiveness
GOBAR_DD14789	TC-rich repeats	GTTTTCTTAC	1687	9	+	Nicotiana tabacum	cis-acting element involved in defense and stress responsiveness
GOBAR_DD14789	ABRE	ACGTG	1778	5	-	Arabidopsis thaliana	cis-acting element involved in the abscisic acid responsiveness
GOBAR_DD14789	CGTCA-motif	CGTCA	260	5	+	Hordeum vulgare	cis-acting regulatory element involved in the MeJA-responsiveness
GOBAR_DD14789	TGACG-motif	TGACG	260	5	-	Hordeum vulgare	cis-acting regulatory element involved in the MeJA-responsiveness
GOBAR_DD14789	MBS	CAACTG	263	6	+	Arabidopsis thaliana	MYB binding site involved in drought-inducibility
GOBAR_DD02562	TGA-element	AACGAC	1355	6	+	Brassica oleracea	auxin-responsive element
GOBAR_DD02562	TCA-element	CCATCTTTTT	1861	9	+	Nicotiana tabacum	cis-acting element involved in salicylic acid responsiveness
GOBAR_DD02562	MRE	AACCTAA	1093	7	+	Petroselinum crispum	MYB binding site involved in light responsiveness
GOBAR_DD02556	TCA-element	CCATCTTTTT	35	9	+	Nicotiana tabacum	cis-acting element involved in salicylic acid responsiveness
GOBAR_DD02556	CCAAT-box	CAACGG	456	6	-	Hordeum vulgare	MYBHv1 binding site
GOBAR_DD02556	CCAAT-box	CAACGG	1001	6	-	Hordeum vulgare	MYBHv1 binding site
GOBAR_DD02552	TATC-box	TATCCCA	1839	7	-	Oryza sativa	cis-acting element involved in gibberellin-responsiveness
GOBAR_DD02552	CGTCA-motif	CGTCA	214	5	+	Hordeum vulgare	cis-acting regulatory element involved in the MeJA-responsiveness
GOBAR_DD02552	CGTCA-motif	CGTCA	221	5	-	Hordeum vulgare	cis-acting regulatory element involved in the MeJA-responsiveness
GOBAR_DD02552	CGTCA-motif	CGTCA	845	5	+	Hordeum vulgare	cis-acting regulatory element involved in the MeJA-responsiveness
GOBAR_DD02552	CGTCA-motif	CGTCA	1186	5	-	Hordeum vulgare	cis-acting regulatory element involved in the MeJA-responsiveness
GOBAR_DD02552	TGACG-motif	TGACG	214	5	-	Hordeum vulgare	cis-acting regulatory element involved in the MeJA-responsiveness
GOBAR_DD02552	TGACG-motif	TGACG	221	5	+	Hordeum vulgare	cis-acting regulatory element involved in the MeJA-responsiveness
GOBAR_DD02552	TGACG-motif	TGACG	845	5	-	Hordeum vulgare	cis-acting regulatory element involved in the MeJA-responsiveness
GOBAR_DD02552	TGACG-motif	TGACG	1186	5	+	Hordeum vulgare	cis-acting regulatory element involved in the MeJA-responsiveness
GOBAR_DD06292	TC-rich repeats	ATTCTCTAAC	599	9	-	Nicotiana tabacum	cis-acting element involved in defense and stress responsiveness
GOBAR_DD06292	TC-rich repeats	ATTCTCTAAC	1527	9	+	Nicotiana tabacum	cis-acting element involved in defense and stress responsiveness
GOBAR_DD06292	TCA-element	CCATCTTTTT	733	9	+	Nicotiana tabacum	cis-acting element involved in salicylic acid responsiveness
GOBAR_DD06292	CGTCA-motif	CGTCA	29	5	+	Hordeum vulgare	cis-acting regulatory element involved in the MeJA-responsiveness
GOBAR_DD06292	TGACG-motif	TGACG	29	5	-	Hordeum vulgare	cis-acting regulatory element involved in the MeJA-responsiveness
GOBAR_DD25387	TATC-box	TATCCCA	1738	7	-	Oryza sativa	cis-acting element involved in gibberellin-responsiveness
GOBAR_DD25387	TCA-element	CCATCTTTTT	1113	9	-	Nicotiana tabacum	cis-acting element involved in salicylic acid responsiveness
GOBAR_DD25387	ABRE	TACGGTC	569	7	-	Arabidopsis thaliana	cis-acting element involved in the abscisic acid responsiveness
GOBAR_DD25387	ABRE	ACGTG	1610	5	-	Arabidopsis thaliana	cis-acting element involved in the abscisic acid responsiveness
GOBAR_DD25387	TGACG-motif	TGACG	1995	5	+	Hordeum vulgare	cis-acting regulatory element involved in the MeJA-responsiveness
GOBAR_DD25387	CGTCA-motif	CGTCA	1995	5	-	Hordeum vulgare	cis-acting regulatory element involved in the MeJA-responsiveness
GOBAR_DD25387	MBS	CAACTG	147	6	+	Arabidopsis thaliana	MYB binding site involved in drought-inducibility
GOBAR_DD25387	MBS	CAACTG	1214	6	-	Arabidopsis thaliana	MYB binding site involved in drought-inducibility
GOBAR_DD25387	MRE	AACCTAA	1056	7	-	Petroselinum crispum	MYB binding site involved in light responsiveness
GOBAR_DD25387	CCAAT-box	CAACGG	791	6	-	Hordeum vulgare	MYBHv1 binding site
GOBAR_DD30686	TGA-element	AACGAC	1652	6	-	Brassica oleracea	auxin-responsive element
GOBAR_DD30686	MRE	AACCTAA	463	7	-	Petroselinum crispum	MYB binding site involved in light responsiveness
GOBAR_DD34889	ABRE	CACGTG	1754	6	-	Arabidopsis thaliana	cis-acting element involved in the abscisic acid responsiveness
GOBAR_DD34889	ABRE	ACGTG	1755	5	+	Arabidopsis thaliana	cis-acting element involved in the abscisic acid responsiveness
GOBAR_DD34889	ABRE	ACGTG	1937	5	+	Arabidopsis thaliana	cis-acting element involved in the abscisic acid responsiveness
GOBAR_DD34889	CGTCA-motif	CGTCA	622	5	+	Hordeum vulgare	cis-acting regulatory element involved in the MeJA-responsiveness
GOBAR_DD34889	CGTCA-motif	CGTCA	1242	5	+	Hordeum vulgare	cis-acting regulatory element involved in the MeJA-responsiveness
GOBAR_DD34889	CGTCA-motif	CGTCA	1391	5	-	Hordeum vulgare	cis-acting regulatory element involved in the MeJA-responsiveness
GOBAR_DD34889	CGTCA-motif	CGTCA	1443	5	+	Hordeum vulgare	cis-acting regulatory element involved in the MeJA-responsiveness
GOBAR_DD34889	TGACG-motif	TGACG	622	5	-	Hordeum vulgare	cis-acting regulatory element involved in the MeJA-responsiveness
GOBAR_DD34889	TGACG-motif	TGACG	1242	5	-	Hordeum vulgare	cis-acting regulatory element involved in the MeJA-responsiveness
GOBAR_DD34889	TGACG-motif	TGACG	1391	5	+	Hordeum vulgare	cis-acting regulatory element involved in the MeJA-responsiveness
GOBAR_DD34889	TGACG-motif	TGACG	1443	5	-	Hordeum vulgare	cis-acting regulatory element involved in the MeJA-responsiveness
GOBAR_DD34889	MBS	CAACTG	864	6	+	Arabidopsis thaliana	MYB binding site involved in drought-inducibility
GOBAR_DD34889	MBS	CAACTG	1123	6	+	Arabidopsis thaliana	MYB binding site involved in drought-inducibility
GOBAR_DD34889	CCAAT-box	CAACGG	955	6	+	Hordeum vulgare	MYBHv1 binding site
GOBAR_DD09955	ABRE	GCCGCGTGGC	621	9	-	Oryza sativa	cis-acting element involved in the abscisic acid responsiveness
GOBAR_DD09955	ABRE	ACGTG	639	5	+	Arabidopsis thaliana	cis-acting element involved in the abscisic acid responsiveness
GOBAR_DD09955	MBS	CAACTG	1473	6	+	Arabidopsis thaliana	MYB binding site involved in drought-inducibility
GOBAR_DD28836	TCA-element	CCATCTTTTT	1019	9	+	Nicotiana tabacum	cis-acting element involved in salicylic acid responsiveness
GOBAR_DD28836	MBS	CAACTG	1368	6	+	Arabidopsis thaliana	MYB binding site involved in drought-inducibility
GOBAR_DD28836	MRE	AACCTAA	1584	7	+	Petroselinum crispum	MYB binding site involved in light responsiveness
GOBAR_DD07506	TGA-element	AACGAC	1774	6	+	Brassica oleracea	auxin-responsive element
GOBAR_DD07506	TGA-element	AACGAC	1808	6	+	Brassica oleracea	auxin-responsive element
GOBAR_DD07506	ABRE	AACCCGG	518	7	+	Arabidopsis thaliana	cis-acting element involved in the abscisic acid responsiveness
GOBAR_DD07506	AuxRR-core	GGTCCAT	487	7	-	Nicotiana tabacum	cis-acting regulatory element involved in auxin responsiveness
GOBAR_DD07506	MBS	CAACTG	1869	6	-	Arabidopsis thaliana	MYB binding site involved in drought-inducibility
GOBAR_DD07506	MRE	AACCTAA	1356	7	+	Petroselinum crispum	MYB binding site involved in light responsiveness
GOBAR_DD34891	TGA-element	AACGAC	889	6	-	Brassica oleracea	auxin-responsive element
GOBAR_DD34891	TGA-element	AACGAC	933	6	+	Brassica oleracea	auxin-responsive element
GOBAR_DD34891	TC-rich repeats	GTTTTCTTAC	1047	9	+	Nicotiana tabacum	cis-acting element involved in defense and stress responsiveness
GOBAR_DD34891	TC-rich repeats	GTTTTCTTAC	1092	9	-	Nicotiana tabacum	cis-acting element involved in defense and stress responsiveness
GOBAR_DD34891	TC-rich repeats	ATTCTCTAAC	1559	9	-	Nicotiana tabacum	cis-acting element involved in defense and stress responsiveness
GOBAR_DD34891	ABRE	ACGTG	795	5	+	Arabidopsis thaliana	cis-acting element involved in the abscisic acid responsiveness
GOBAR_DD34891	ABRE	ACGTG	806	5	-	Arabidopsis thaliana	cis-acting element involved in the abscisic acid responsiveness
GOBAR_DD34891	CGTCA-motif	CGTCA	808	5	+	Hordeum vulgare	cis-acting regulatory element involved in the MeJA-responsiveness
GOBAR_DD34891	CGTCA-motif	CGTCA	1186	5	+	Hordeum vulgare	cis-acting regulatory element involved in the MeJA-responsiveness
GOBAR_DD34891	TGACG-motif	TGACG	808	5	-	Hordeum vulgare	cis-acting regulatory element involved in the MeJA-responsiveness
GOBAR_DD34891	TGACG-motif	TGACG	1186	5	-	Hordeum vulgare	cis-acting regulatory element involved in the MeJA-responsiveness
GOBAR_DD34891	MBSI	aaaAaaC(G/C)GTTA	1042	11.5	-	Petunia hybrida	MYB binding site involved in flavonoid biosynthetic genes regulation
GOBAR_DD34891	MBSI	TTTTTACGGTTA	1050	11	+	Petunia hybrida	MYB binding site involved in flavonoid biosynthetic genes regulation
GOBAR_DD23791	ABRE	ACGTG	971	5	+	Arabidopsis thaliana	cis-acting element involved in the abscisic acid responsiveness
GOBAR_DD23791	ABRE	CACGTG	1091	6	-	Arabidopsis thaliana	cis-acting element involved in the abscisic acid responsiveness
GOBAR_DD23791	ABRE	ACGTG	1092	5	+	Arabidopsis thaliana	cis-acting element involved in the abscisic acid responsiveness
GOBAR_DD23791	ABRE	ACGTG	1293	5	-	Arabidopsis thaliana	cis-acting element involved in the abscisic acid responsiveness
GOBAR_DD23791	ABRE	TACGGTC	1950	7	-	Arabidopsis thaliana	cis-acting element involved in the abscisic acid responsiveness
GOBAR_DD23791	MBS	CAACTG	1745	6	+	Arabidopsis thaliana	MYB binding site involved in drought-inducibility
GOBAR_DD26455	TATC-box	TATCCCA	1591	7	+	Oryza sativa	cis-acting element involved in gibberellin-responsiveness
GOBAR_DD26455	ABRE	ACGTG	739	5	-	Arabidopsis thaliana	cis-acting element involved in the abscisic acid responsiveness
GOBAR_DD26455	ABRE	ACGTG	827	5	-	Arabidopsis thaliana	cis-acting element involved in the abscisic acid responsiveness
GOBAR_DD26455	ABRE	ACGTG	1064	5	+	Arabidopsis thaliana	cis-acting element involved in the abscisic acid responsiveness
GOBAR_DD26455	ABRE	CACGTG	1287	6	-	Arabidopsis thaliana	cis-acting element involved in the abscisic acid responsiveness
GOBAR_DD26455	ABRE	ACGTG	1288	5	+	Arabidopsis thaliana	cis-acting element involved in the abscisic acid responsiveness
GOBAR_DD26455	ABRE	ACGTG	1635	5	+	Arabidopsis thaliana	cis-acting element involved in the abscisic acid responsiveness
GOBAR_DD26455	MBSI	TTTTTACGGTTA	1657	11	+	Petunia hybrida	MYB binding site involved in flavonoid biosynthetic genes regulation
GOBAR_DD26455	MRE	AACCTAA	859	7	-	Petroselinum crispum	MYB binding site involved in light responsiveness
GOBAR_DD26455	CCAAT-box	CAACGG	447	6	+	Hordeum vulgare	MYBHv1 binding site
GOBAR_DD23792	TCA-element	CCATCTTTTT	353	9	-	Nicotiana tabacum	cis-acting element involved in salicylic acid responsiveness
GOBAR_DD23792	ABRE	GACACGTGGC	1691	9	-	Triticum aestivum	cis-acting element involved in the abscisic acid responsiveness
GOBAR_DD23792	ABRE	CACGTG	1693	6	-	Arabidopsis thaliana	cis-acting element involved in the abscisic acid responsiveness
GOBAR_DD23792	ABRE	ACGTG	1694	5	+	Arabidopsis thaliana	cis-acting element involved in the abscisic acid responsiveness
